# Supplementary material for: Metformin Antagonizes Cancer Cell Proliferation by Suppressing Mitochondrial-Dependent Biosynthesis
Source: PLoS Biol. 2015 Dec 1;13(12):e1002309. doi: 10.1371/journal.pbio.1002309 (PMC4666657; doi:10.1371/journal.pbio.1002309)
Supplement: S5 Data — (XLSX) [file pbio.1002309.s005.xlsx]

## Sheet: Fig 5a-b
	143B wt -Metf 1	143B wt -Metf 2	143B wt -Metf 3	143B wt +Metf 1	143B wt +Metf 2	143B wt +Metf 3	143Bcytb -Metf 1	143Bcytb -Metf 2	143Bcytb -Metf 3	143Bcytb +Metf 1	143Bcytb +Metf 2	143Bcytb +Metf 3
Citric (459,431)	54804	81088	55983	13780	12499	10872	2341	2071	2022	3693	3052	2278
Citric m+1 (460,432)	29224	42046	30080	6294	6229	5773	1661	1739	1772	2111	1624	1733
Citric m+2 (461,433)	311261	440453	282890	4167	5816	4111	1421	661	1261	1505	1317	1029
Citric m+3 (462,434)	129989	186836	123455	3357	3243	2811	404	575	552	1269	739	1224
Citric m+4 (463,435)	163244	240463	155016	1311	1555	1877	122	135	0	353	741	484
Citric m+5 (464,436)	139109	204869	135479	1283	2095	988	113	130	148	237	417	389
Citric m+6 (465, 437)	77751	114725	72149	272	715	314	0	102	0	137	212	0
Myristic-D27 ISTD	2627454	2720837	2310084	2767631	2610367	2747442	2632091	2337271	2429002	2433484	2756566	2754087

## Sheet: Fig 5c-d
	143B wt -Metf 1	143B wt -Metf 2	143B wt -Metf 3	143B wt +Metf 1	143B wt +Metf 2	143B wt +Metf 3	143Bcytb -Metf 1	143Bcytb -Metf 2	143Bcytb -Metf 3	143Bcytb +Metf 1	143Bcytb +Metf 2	143Bcytb +Metf 3
Citric (459,431)	242542	199656	257780	10308	10032	10387	6577	6737	4873	8367	8371	8766
Citric m+1 (460,432)	158354	130779	167944	5210	5261	4670	3573	3556	3518	4037	4092	4361
Citric m+2 (461,433)	204121	168806	214035	5793	5700	3751	2515	2479	2489	3603	3572	3862
Citric m+3 (462,434)	147131	121884	154526	4660	4584	3950	3040	3095	3176	5024	5062	5439
Citric m+4 (463,435)	389543	320144	404300	4260	4084	3339	2004	1998	1952	3217	3214	3525
Citric m+5 (464,436)	183098	149724	191135	22337	21685	20961	13133	13010	11699	25251	25160	24339
Citric m+6 (465, 437)	80754	66128	84217	7396	7257	6904	4358	4287	3855	8185	8146	7961
Myristic-D27 ISTD	1299038	1151287	1372364	1708468	1590656	2036669	1562968	1491182	1644904	1375305	1328887	1463178

## Sheet: Fig 5e-f
	143B wt -Metf 1	143B wt -Metf 2	143B wt -Metf 3	143B wt +Metf 1	143B wt +Metf 2	143B wt +Metf 3	143Bcytb -Metf 1	143Bcytb -Metf 2	143Bcytb -Metf 3	143Bcytb +Metf 1	143Bcytb +Metf 2	143Bcytb +Metf 3
Palmitic C16:0 (313,355)	7152552	9006515	8409443	6335202	7142437	6870538	4558326	4863308	6776125	3509786	4354475	3644794
m+1	1804565	2288583	2135864	1606521	1820036	1743112	1153184	1236059	1720982	884475	1101060	923829
m+2	587522	750593	697242	1080333	1180181	1184464	687971	630699	1003152	477080	582395	481672
m+3	100672	127784	120408	235346	256153	255147	145152	127225	210073	101796	122132	100540
m+4	76008	100871	93883	336418	379745	388858	202759	163125	292626	149371	182809	147096
m+5	31025	41414	37324	70886	80756	85354	43799	34296	62415	32190	41015	31934
m+6	185887	239684	227617	93592	111112	115962	58531	46002	82947	50892	61635	48918
m+7	101784	130014	123607	17653	21480	22677	10930	8873	16377	9445	12297	9918
m+8	550507	711156	664201	20584	25987	28234	12223	9372	17163	12387	14765	12116
m+9	300167	386153	363304	4216	4717	5374	2315	1588	2942	1861	2931	2625
m+10	1330200	1723281	1632337	7968	7968	8189	3242	1908	3093	2378	3167	3877
m+11	629922	815579	773568	2747	1729	2367	924	401	729	343	772	1255
m+12	2307471	2998885	2860494	11074	8237	8756	4890	3310	5053	2659	3357	6044
m+13	837728	1093091	1043741	3858	2502	2671	1839	818	1409	621	1027	1939
m+14	2487499	3250055	3108130	12197	9169	10181	6031	4606	6819	3274	4105	7182
m+15	574757	748646	730030	2964	2422	2519	1415	1362	1890	1002	1114	1714
m+16	1268374	1644601	1601891	4611	2739	3376	1893	845	1568	630	1070	3010

## Sheet: Fig 5g
	143B wt -Metf 1	143B wt -Metf 2	143B wt -Metf 3	143B wt +Metf 1	143B wt +Metf 2	143B wt +Metf 3	143Bcytb -Metf 1	143Bcytb -Metf 2	143Bcytb -Metf 3	143Bcytb +Metf 1	143Bcytb +Metf 2	143Bcytb +Metf 3
Palmitic C16:0 (313,355)	12598406	15762656	15651968	6810303	4782871	7260534	5918065	4680845	5757485	6718902	5945146	6428523
m+1	3678150	4617596	4601740	1736455	1217354	1850809	1500829	1186589	1450521	1704884	1507828	1638282
m+2	3637506	4618812	4602812	562764	392953	599172	479953	383496	472022	550977	484168	526103
m+3	927858	1184302	1182832	92965	63871	99672	78272	63220	76822	91148	78816	85300
m+4	748914	959584	963405	55722	36687	58907	48412	39810	47265	54077	46570	50818
m+5	171884	217578	221338	14735	9697	14942	12674	10789	13221	14262	12427	13397
m+6	104728	134181	137731	108274	73015	118759	110563	90026	108775	121473	105237	111068
m+7	20274	26437	27286	33450	22165	36593	33848	27083	33122	36849	31625	32814
m+8	10570	13474	13719	275297	185496	305302	282511	223006	274383	310110	268635	277779
m+9	1705	2286	2266	77207	51589	84055	76694	61354	74884	83582	72663	75049
m+10	990	1148	1386	556923	374736	609329	530901	422784	521130	576551	504236	521469
m+11	0	37	80	131721	88709	146138	123183	96656	120033	131259	115337	118929
m+12	6939	8490	8478	774777	532137	863786	694492	546558	683341	737463	651849	679037
m+13	1969	2840	2867	147247	100711	162449	127001	101149	126521	131476	118419	120716
m+14	11020	14575	14585	674047	467404	744631	560343	444001	552477	578813	511404	535934
m+15	3365	4763	4574	89665	62151	102005	74107	58228	73347	75914	67599	71317
m+16	2549	3602	3542	274304	191555	305169	215092	169659	214440	216302	190475	202586
